# Supplementary material for: Combined image guided monitoring the pharmacokinetics of rapamycin loaded human serum albumin nanoparticles with a split luciferase reporter
Source: Royal Society of Chemistry journal article supplement (doi:10.1039/c5nr07308a), 2016-01-01
Supplement: c5nr07308a1.pdf [file c5nr07308a1.pdf]

**Supporting Information for**

**Combined image guided monitoring the pharmacokinetics of**

**rapamycin loaded human serum albumin nanoparticles with a split**

**luciferase reporter**

*Fu Wang<sup>a, b\*</sup>, Kai Yang<sup>b, c</sup>, Zhe Wang<sup>b</sup>, Ying Ma<sup>b</sup>, J. Silvio Gutkind<sup>d</sup>, Naoki Hida<sup>b</sup>,  
Gang Niu<sup>b</sup>, Jie Tian<sup>a, e\*</sup>*

*a. Engineering Research Center of Molecular and Neuro Imaging, Ministry of Education, School of Life Science and Technology, Xidian University, Xi'an, Shaanxi 710071, China*

*b. Laboratory of Molecular Imaging and Nanomedicine, National Institute of Biomedical Imaging and Bioengineering, National Institutes of Health, Bethesda, Maryland 20892, United States*

*c. School of Radiation Medicine and Protection & School for Radiological and Interdisciplinary Sciences (RAD-X), Collaborative Innovation Center of Suzhou Nano Science and Technology & Collaborative Innovation Center of Radiation Medicine of Jiangsu Higher Education Institutions, Medical College of Soochow University, Suzhou, Jiangsu 215123, China*

*d. Oral and Pharyngeal Cancer Branch, National Institute of Craniofacial and Dental Research, National Institutes of Health, Bethesda, Maryland 20892, United States*

*e. Key Laboratory of Molecular Imaging of Chinese Academy of Sciences, Institute of Automation, Chinese Academy of Sciences, Beijing 100190, China*

\* For correspondence or reprint contact either of the following:

Fu Wang, email: [fwang@xidian.edu.cn](mailto:fwang@xidian.edu.cn);

Jie Tian, email: [jaytian99@gmail.com](mailto:jaytian99@gmail.com)

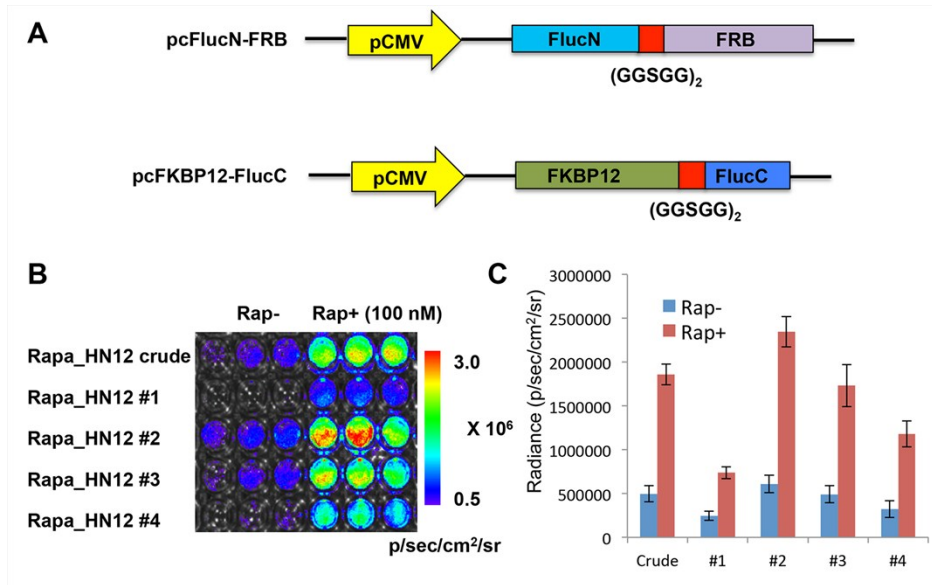

Figure S1. Validation of HN12 stable cell line expression split luciferase reporter. (A) Scheme of the split firefly luciferase reporter. The plasmids pcFlucN-FRB and pcFKBP12-FlucC allows expression of the fusion gene of interest with an N-terminal FlucN and FRB or with FKBP12 and a C-terminal FlucC under the control of CMV promoter. An in-frame coding sequence for a GGSGGGGSGG linker is indicated as red color. (B) The HN12 cells were transfected with plasmids pcFlucN-FRB and pcFKBP12-FlucC and selected byzeocin (500  $\mu$ g/ml) for approximately 3 weeks. Four stable cell lineswere treated with free rapamycin (100 nM) and then subjected to bioluminescence imaging. (C) Qualification of the bioluminescence imaging experiments described in (B).

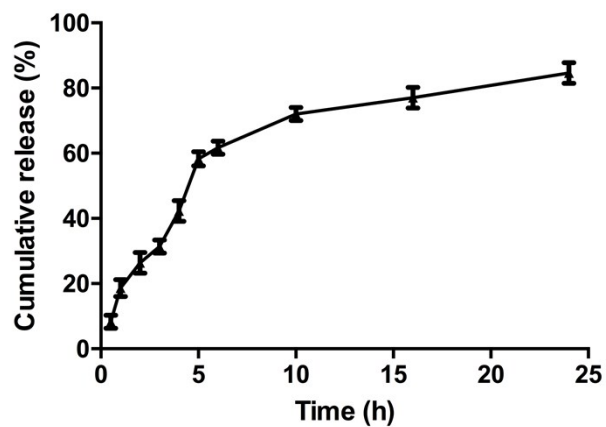

Figure S2. In vitro release profile of rapamycin from HSA Rapa nanoparticles in serum-containing medium. The percentage of rapamycin released was plotted against time.

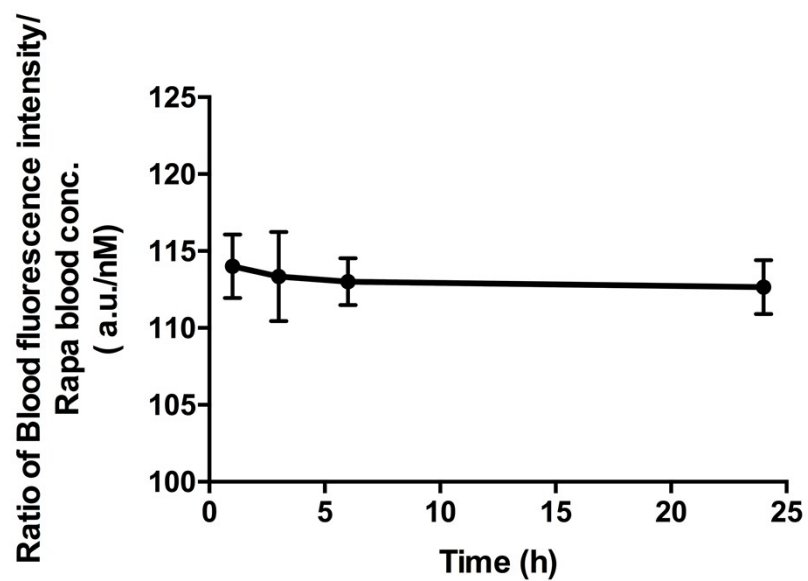

Figure S3. The ratio of fluorescence signal to rapamycin blood concentration obtained by LC-MS at various time points (1h, 3 h, 6 h, 24 h). Cy5 labeled HSA Rapa (10 mg/kg) was intravenously injected into the HN12#2 tumor bearing mice (n=6). At different time points (1, 3, 6, 24 h) after injection, blood was drawn from the tail vein of mice. The concentration of rapamycin (nM) in the blood over time was measured by LC-MS, whereas the fluorescence intensity (a.u.) from the same blood samples was measured by FITR spectrometer.
